# Supplementary material
Source: PubMed Central journal article supplement (PMC3984616)
Supplement: NIHMS532271-supplement-01.pdf [file NIHMS532271-supplement-01.pdf]

## Online Supporting Material

### Supplemental Table 1

Bisulfite-converted gene-specific primers (BS), methylation-specific PCR (MSP) primers, and their associated parameters for the first study

| Primer Set               | Sense Primer (5' to 3')      | Anti-sense Primer (5' to 3') | Size <sup>1</sup><br>(bp) | Anneal<br>temp.,<br>°C | Genomic<br>position <sup>2</sup> |
|--------------------------|------------------------------|------------------------------|---------------------------|------------------------|----------------------------------|
| CYP27A1 BS               | TTTTTTAGGGATTAGATGATTGG      | ATCCCCACCCAAAACRACCCT        | 146                       | 59                     | -69                              |
| CYP27A1 MSP Methylated   | TTTTTCGTTTCGAATTGATTTCG      | AAAAAAAAACGAAAACCGACCG       | 91                        | 60                     | -44                              |
| CYP27A1 MSP Unmethylated | TTTTTTGTTTTGAATTGATTTTG      | AAAAAAAAACAAAACCAACCA        | 91                        | 57                     | -44                              |
| CYP2R1 BS                | GGTTTTAGGGTTGTTGTGGAGT       | CTCAACAACCTAACRAACCCCTA      | 139                       | 61                     | -45                              |
| CYP2R1 MSP Methylated    | CGTATTTTTAGTTCGGGTCGAT       | AAAAACAACAAAAAAAAACGCG       | 88                        | 61                     | -22                              |
| CYP2R1 MSP Unmethylated  | TGTATTTTTAGTTTGGGTTGAT       | AAAAACAACAAAAAAAAACACA       | 88                        | 59                     | -22                              |
| CYP27B1 BS               | TTTTAAGTAYGTTTTTAGAGTGTTTTAT | AAACRTCCCTTCCTACCTACAACCT    | 200                       | 59                     | 163                              |
| CYP27B1 MSP Methylated   | TTATCGCGTTCGTTGGGCGTTCGA     | CTACCTACAACCTCGTATAACCTCGA   | 164                       | 70                     | 191                              |
| CYP27B1 MSP Unmethylated | TTATTGTGTTTGTGGGTGTTTGA      | CTACCTACAACCTCATATAACCTCAA   | 164                       | 60                     | 191                              |
| CYP24A1 BS               | GTAGTTTTTTTGGGTTYGTATT       | AAATAACCCCCAAAAAATCAT        | 178                       | 61                     | -430                             |
| CYP24A1 MSP Methylated   | ATCGCGATTGTGTAAGCGT          | ATACTTCGAACGCGCCTC           | 91                        | 64                     | -387                             |
| CYP24A1 MSP Unmethylated | ATTGTGATTGTGTAAGTGT          | ATACTTCAAACACACCTC           | 91                        | 57                     | -387                             |

<sup>1</sup>Size: the size of a PCR product

<sup>2</sup>Genomic position is the location of the 5' nucleotide of the sense primer in relation to the major transcriptional start site defined in the genome assembly named NCBI Build 36.1 (released in Mar. 2006).

## Supplemental Table 2

Pyrosequencing primers and their associated parameters for the validation study

| Primer Set | Sense Primer<br>(5' to 3')  | Anti-Sense Primer<br>(5' to 3') | Pyrosequencing Primer<br>(5' to 3') | Size <sup>1</sup><br>(bp) | Anneal<br>temp., °C | Genomic<br>position <sup>2</sup> |
|------------|-----------------------------|---------------------------------|-------------------------------------|---------------------------|---------------------|----------------------------------|
| CYP2R1     | TGTTTGGGTTTGTAGGG<br>TTGTTG | CCTCTACTTCAACAA<br>CTAA         | GGTTTTAGGGTTGTTGTG<br>GAGT          | 151                       | 58                  | -45                              |
| CYP24A1    | GGTATYGYGATTGTGT<br>AAG     | AAAATAACCCCCAAA<br>AAATCATA     | GGTATYGYGATTGTGTAA<br>G             | 139                       | 54                  | -390                             |

<sup>1</sup>Size: the size of a PCR product.

<sup>2</sup>Genomic position is the location of the 5' nucleotide of the pyrosequencing primer in relation to the major transcriptional start site defined in the genome assembly named NCBI Build 36.1 (released in Mar. 2006).
